# Supplementary material for: MLN4924 Exerts a Neuroprotective Effect against Oxidative Stress via Sirt1 in Spinal Cord Ischemia-Reperfusion Injury
Source: Oxid Med Cell Longev. 2019 Apr 17;2019:7283639. doi: 10.1155/2019/7283639 (PMC6501157; doi:10.1155/2019/7283639)
Supplement: Supplementary Materials — Supplementary Figure 1: Sirt1 neddylation detection and quantification analysis of Sirt1 mRNA expression. [file 7283639.f1.pdf]

**Supplementary figure 1. Sirt1 neddylation detection and quantification analysis of Sirt1 mRNA expression**

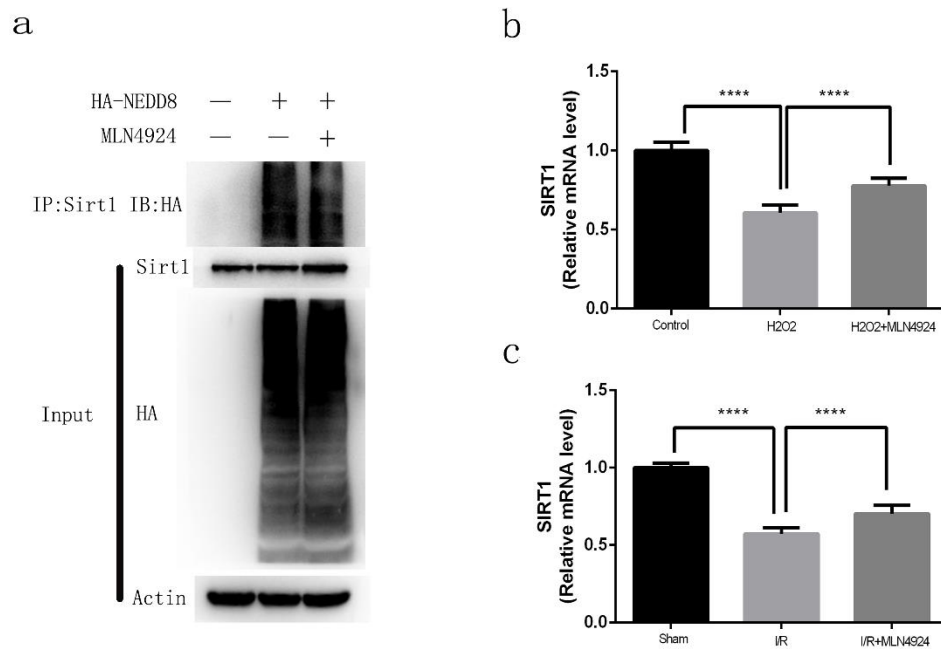

**Supplementary figure 1. Sirt1 neddylation detection and quantification analysis of Sirt1 mRNA expression.** (a) Sirt1 neddylation in SH-SY5Y cells after NEDD8 overexpression treated with or without MLN4924. (b) Quantification analysis of Sirt1 mRNA expression in SH-SY5Y cells treated with or without H<sub>2</sub>O<sub>2</sub>/MLN4924. (c) Quantification analysis of Sirt1 mRNA expression in spinal cord of rats treated with or without MLN4924 after SCIR injury. N=6. \*\*\*\**P*<0.0001. *P*-values were analyzed by one-way ANOVA.
